# Supplementary material for: MicroRNA-31 controls G protein alpha-13 (GNA13) expression and cell invasion in breast cancer cells
Source: PubMed Central journal article supplement (PMC4379695; doi:10.1186/s12943-015-0337-x), 2015-03-26

## Supplementary Data

| Supplementary Table 1 | Primer sequences                                                                 |
|-----------------------|----------------------------------------------------------------------------------|
|                       | <b>GNA13-3'-UTR-miR-Sens cloning - nested primers</b>                            |
| External Fwd          | 5'-TCTGCATGACAACCTCAAGC-3'                                                       |
| External Rev          | 5'-TTGAATTGTTTACAAATGTTTATTAATGTC-3'                                             |
| Internal Fwd          | 5'- ATCGCTCGAGTGTACAAAAGACTTGCTGTTTAAATATCTT-3'                                  |
| Internal Rev          | 5'- ATCATATGCGGCCGCAAATGTCAGTAATTTTACAAAGCAAA-3'                                 |
|                       | <b>Oligos for miR-31 Sensor-miR-Sens cloning (miR-31 seed underlined)</b>        |
| miR-31_Sensor-Fw      | 5'-TCGAGAGCTATGCCAGCATCTTGCCT GC-3'                                              |
| miR-31_Sensor-Rv      | 5'-GGCCGC <u>AGGCAAGATGCTGGC</u> ATAGT C-3'                                      |
|                       | <b>GNA13-3'-UTR- site directed mutagenesis of miR-31 site</b>                    |
| miR-31-Mut-Fwd        | 5'-GCGTGTTTGAATAGTTCTACATCTAGTGCT<br>TCTGCGGAAAAAGAATACATTGTTTAAATTCACAAAATTA-3' |
| miR-31-Mut-Rev        | 5'-TAATTTTGTGAATTTAAACAATGTATTC<br>TTTTTCCGCAGAAGCACTAGATGTAGAACTATTCAAACACGC-3' |

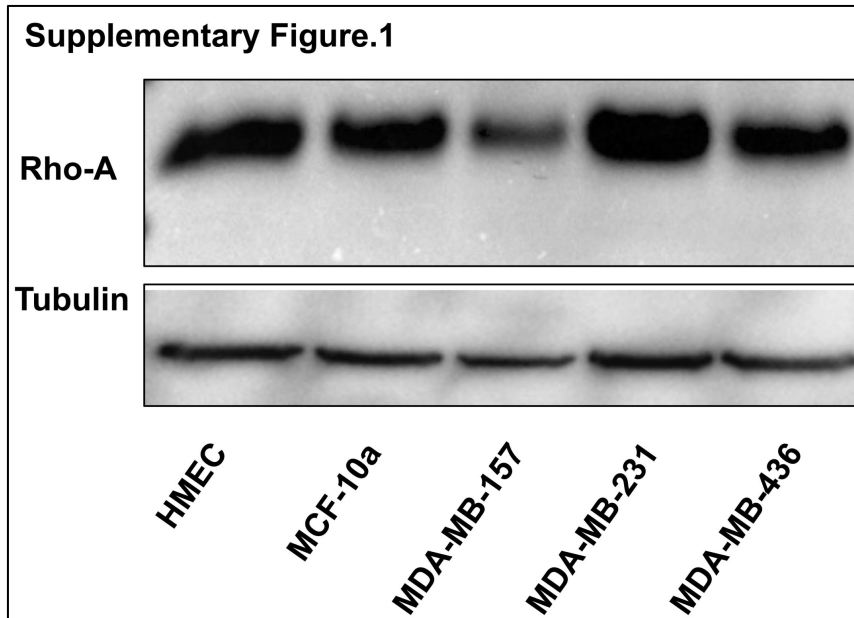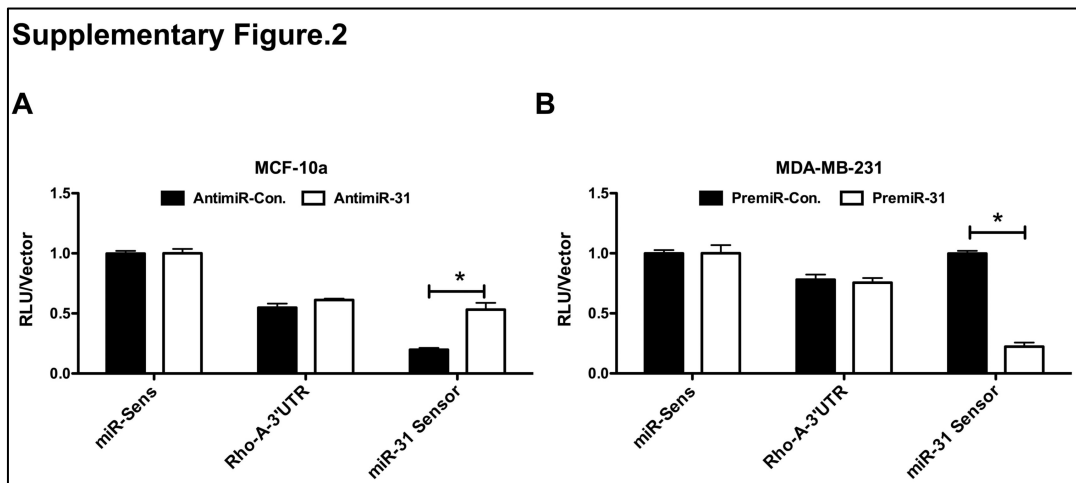

Supplement: 12943_2015_337_MOESM1_ESM.pdf [file 12943_2015_337_MOESM1_ESM.pdf]
